# Supplementary material for: Investigating Transcriptomic Induction of Resistance and/or Virulence in Listeria monocytogenes Cells Surviving Sublethal Antimicrobial Exposure
Source: MDPI journal article supplement (doi:10.3390/foods10102382), 2021-10-08
Supplement: s1 [file s1]

**Table S1.** Statistically significant changes (↑: up regulations; ↓: down regulations;  $P < 0.05$ ) in the expressions of the ten target genes (*groEL*, *hly*, *iap*, *inlA*, *inlB*, *lisK*, *mdrD*, *mdrL*, *prfA*, *sigB*) at the two *L. monocytogenes* strains AAL20066 (ser. 1/2a) and AAL20074 (ser. 4b), following their sublethal exposure (for 2 hours at 37 °C) to BAC (4.0 µg/mL), THY (312.5 µg/mL) or AMP (0.5 µg/mL), in comparison to the untreated controls (no antimicrobial exposure). ∞: no significant change.
